# Supplementary material for: Cisplatin resistance can be curtailed by blunting Bnip3-mediated mitochondrial autophagy
Source: PubMed Central journal article supplement (PMC9033831; doi:10.1038/s41419-022-04741-9), 2022-04-22

# Original uncropped western blots of Figure 1

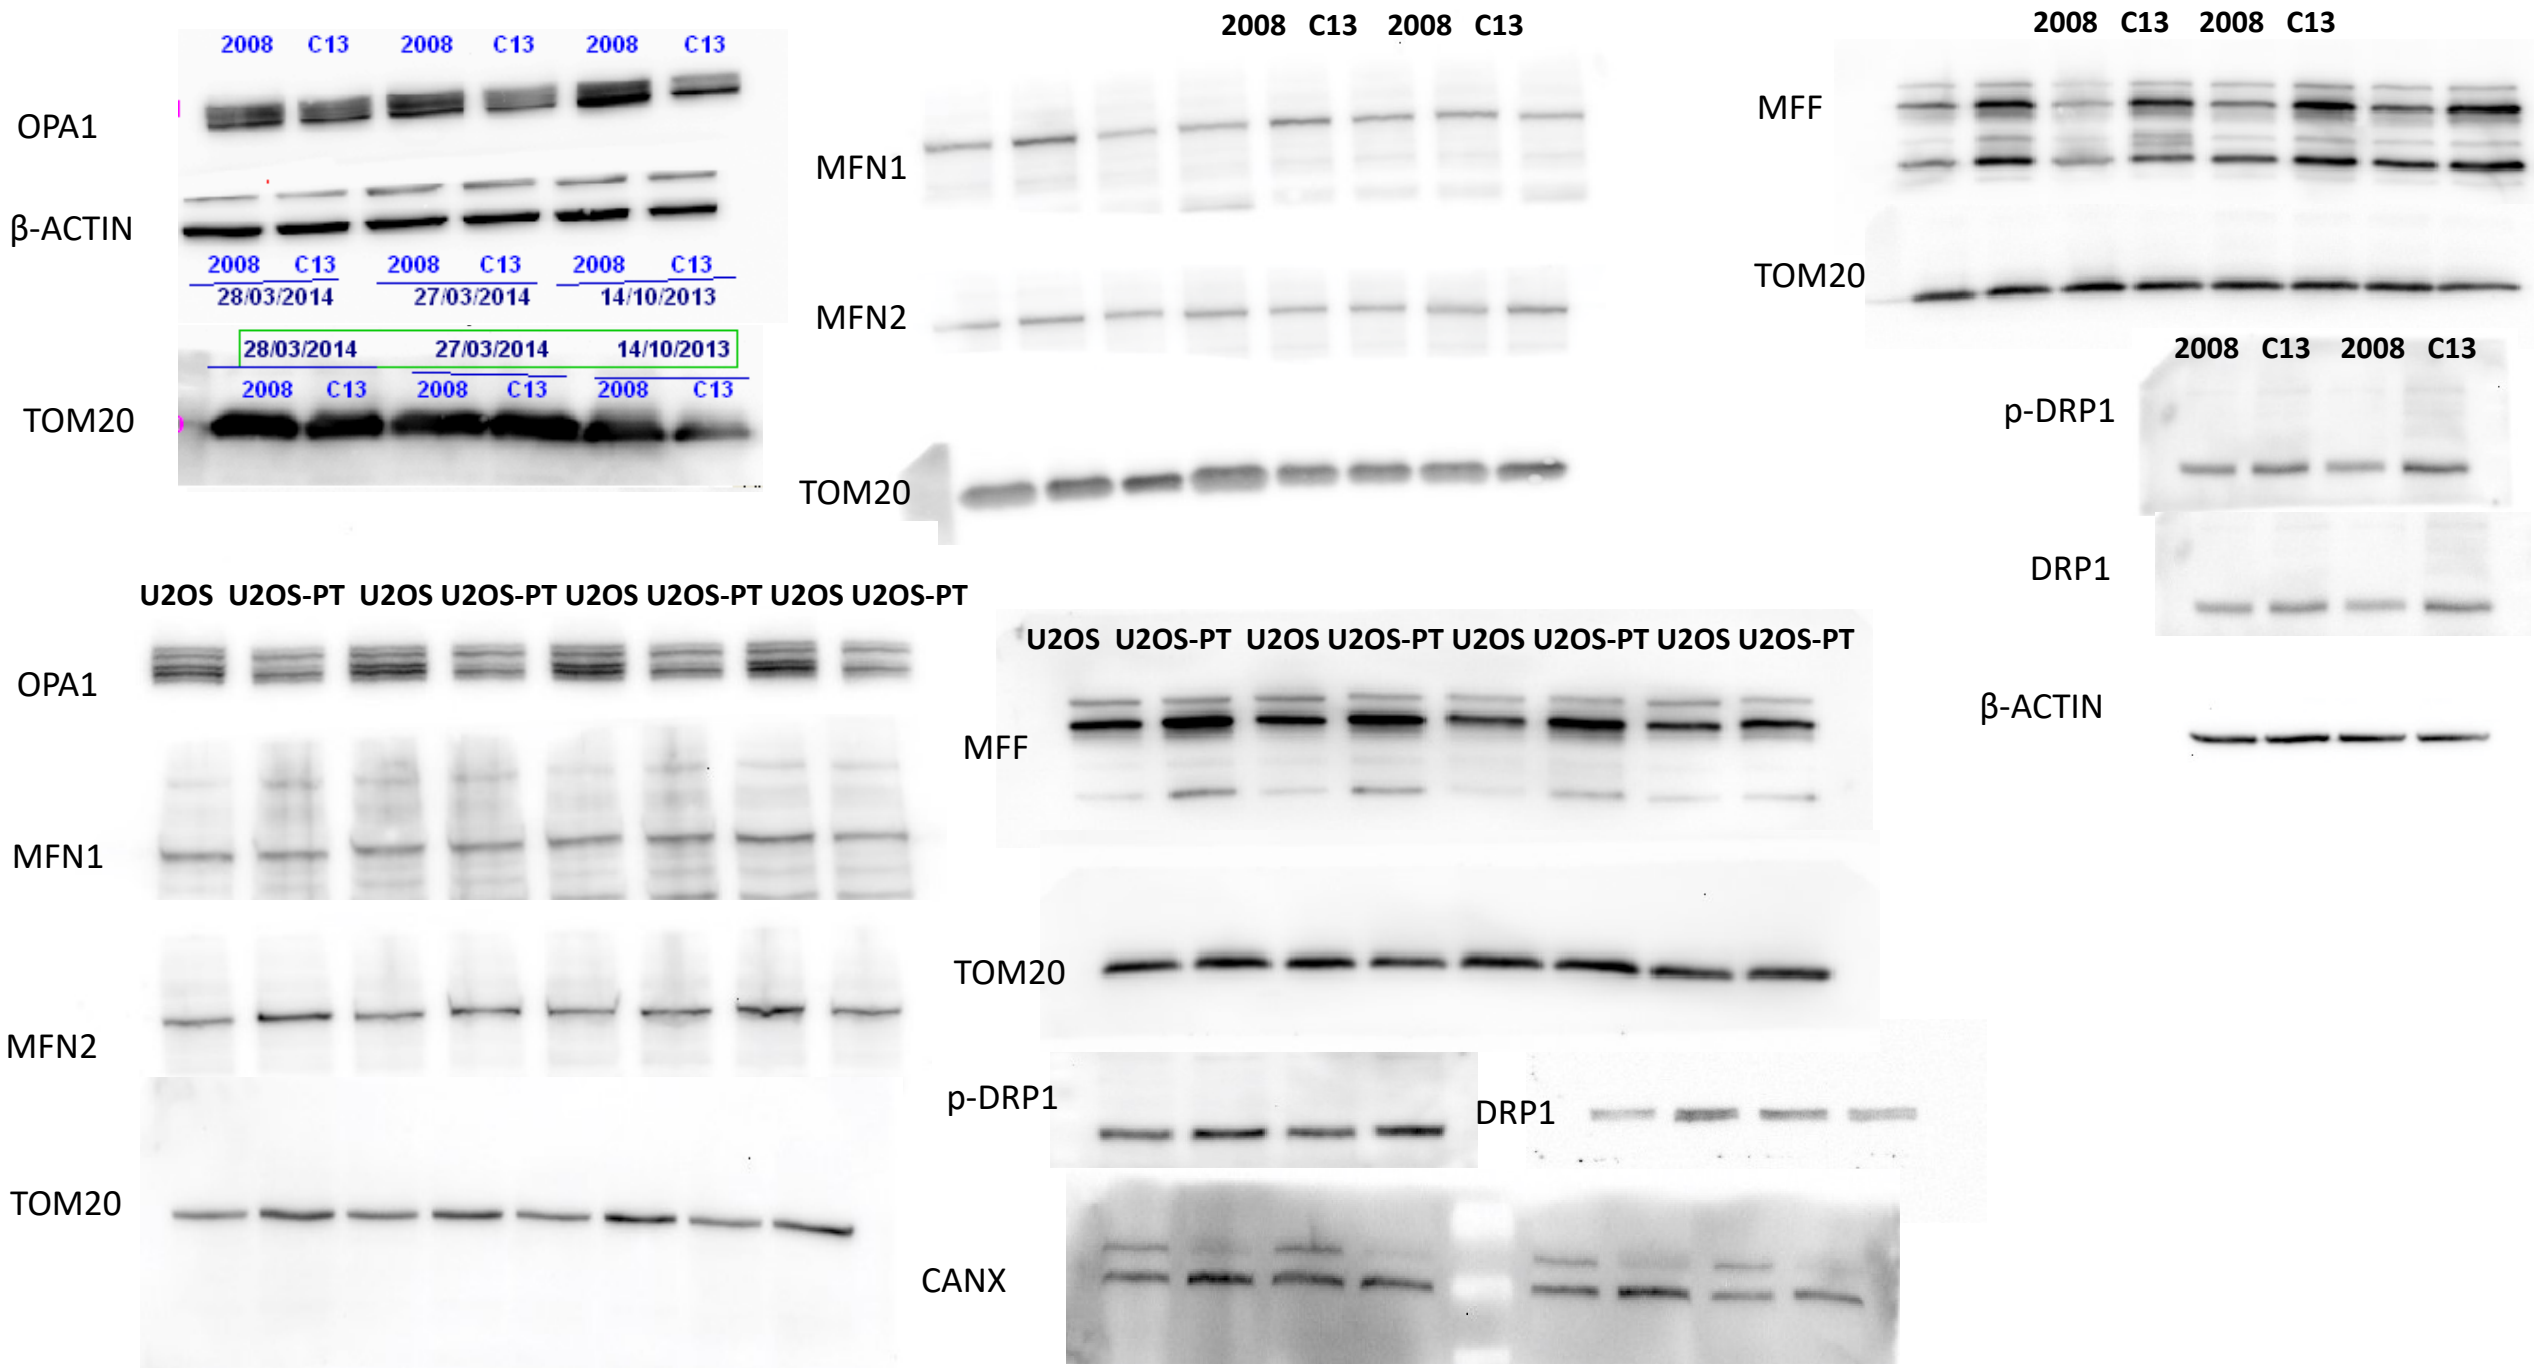

# Original uncropped western blots of Figure 3A

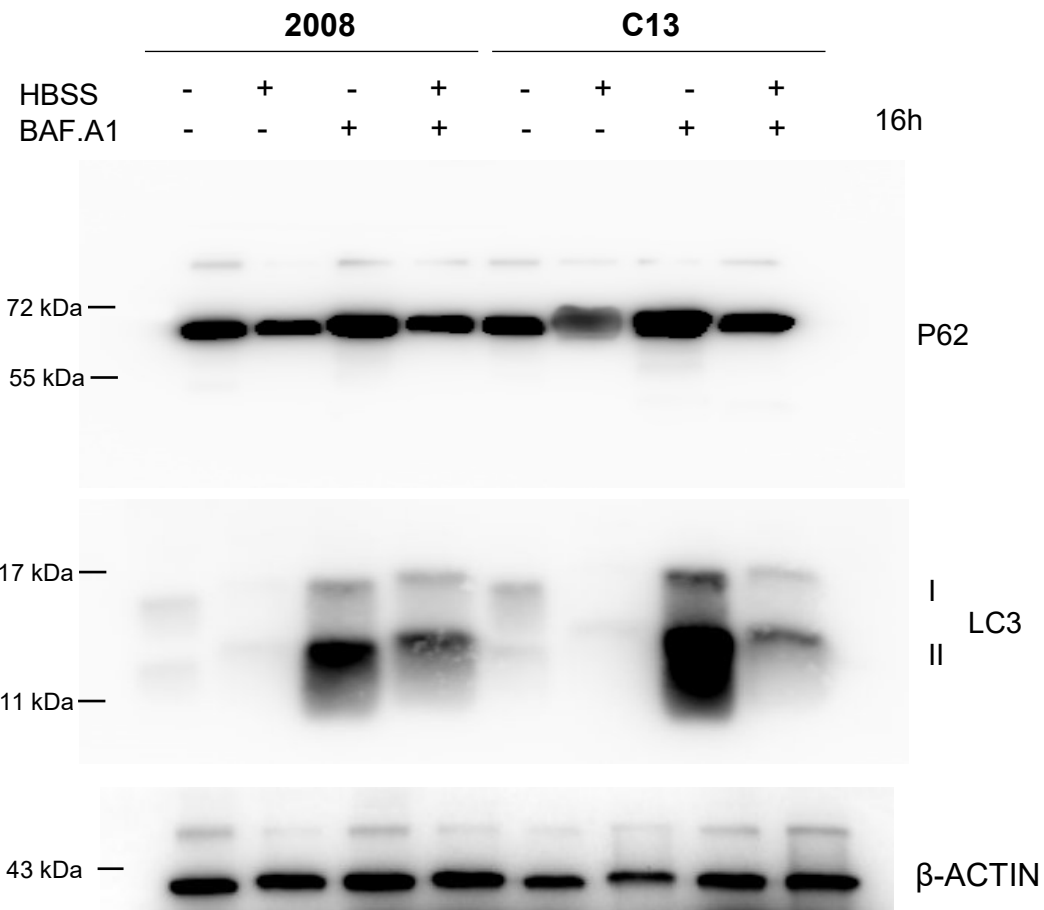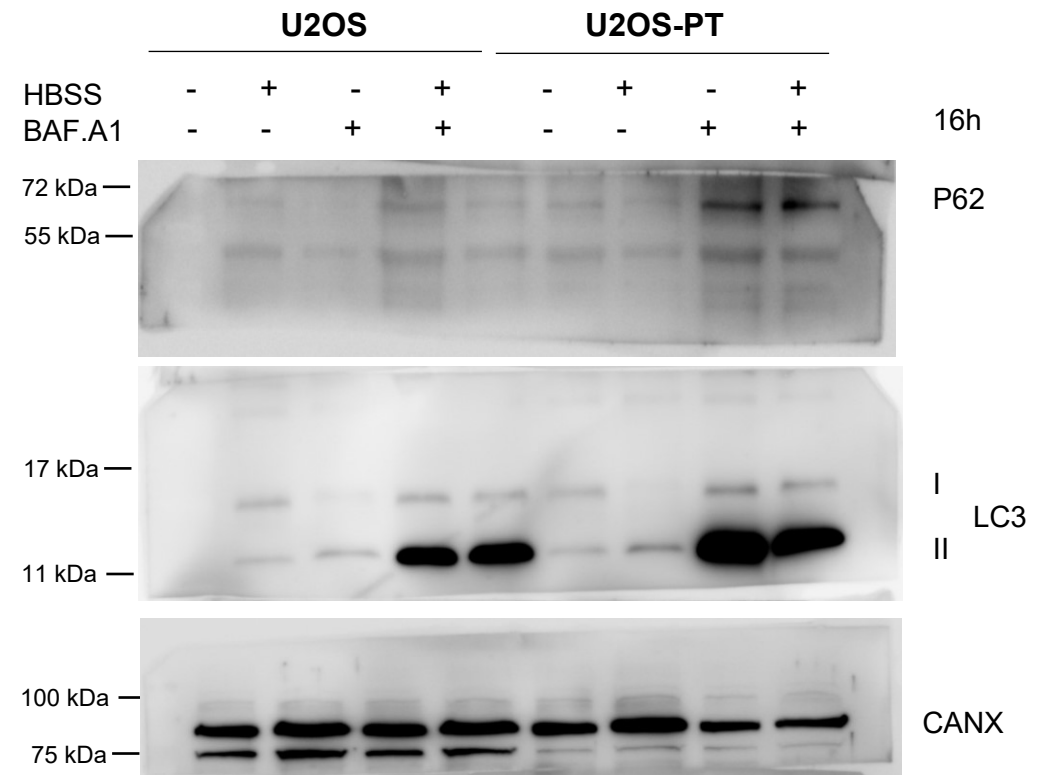

# Original uncropped western blots of Figure 3B

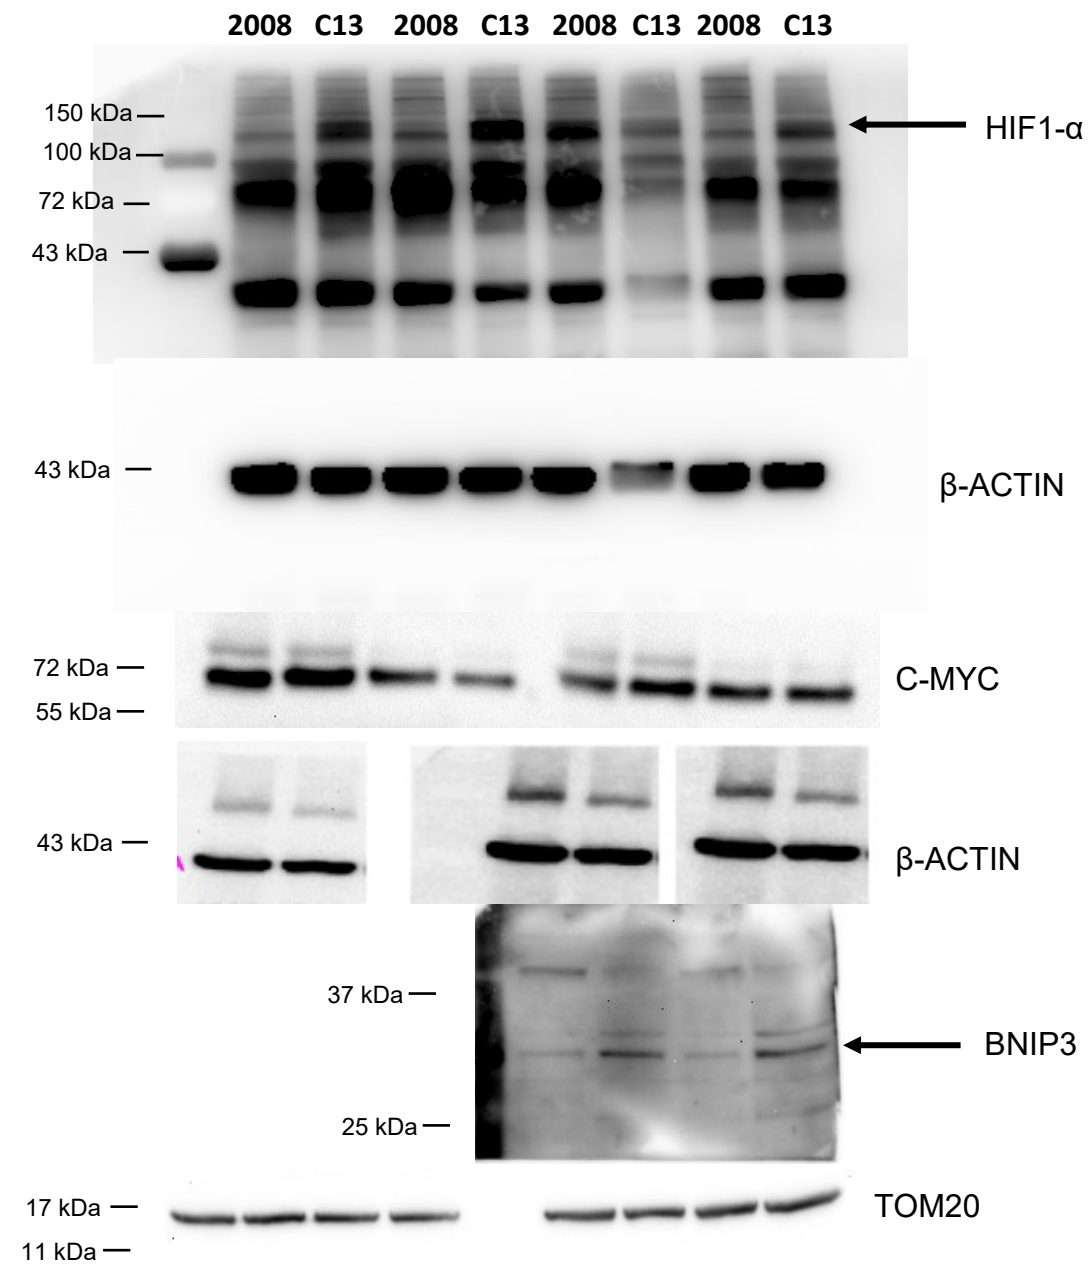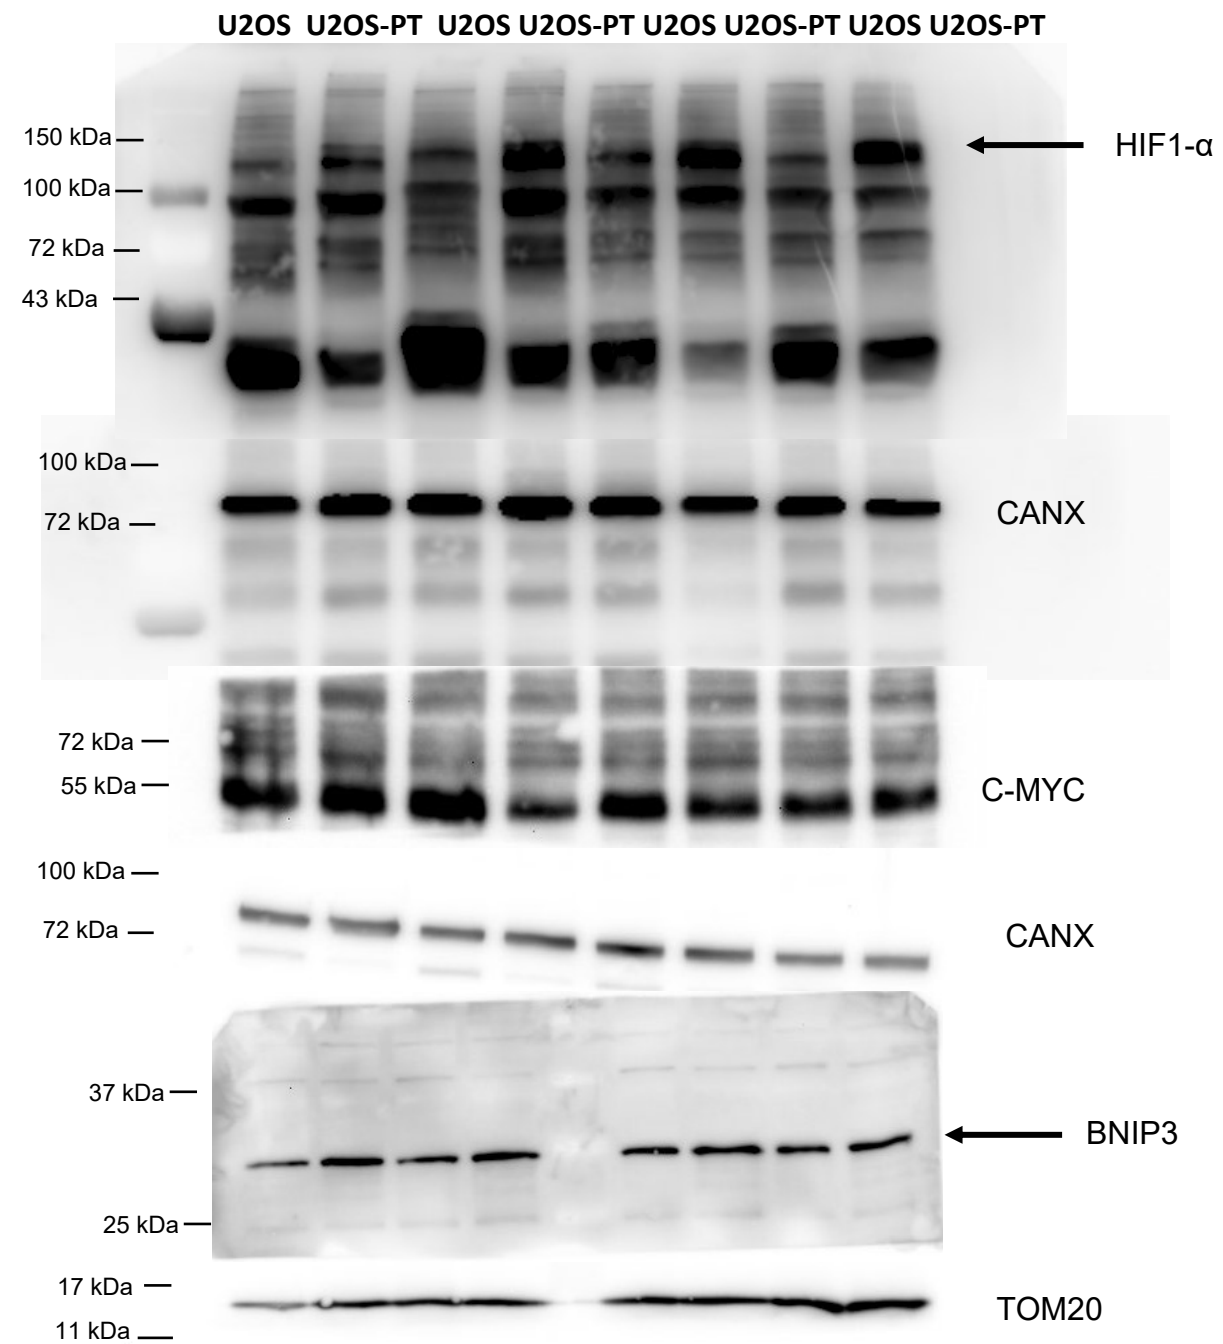

# Original uncropped western blots of Figure 3C

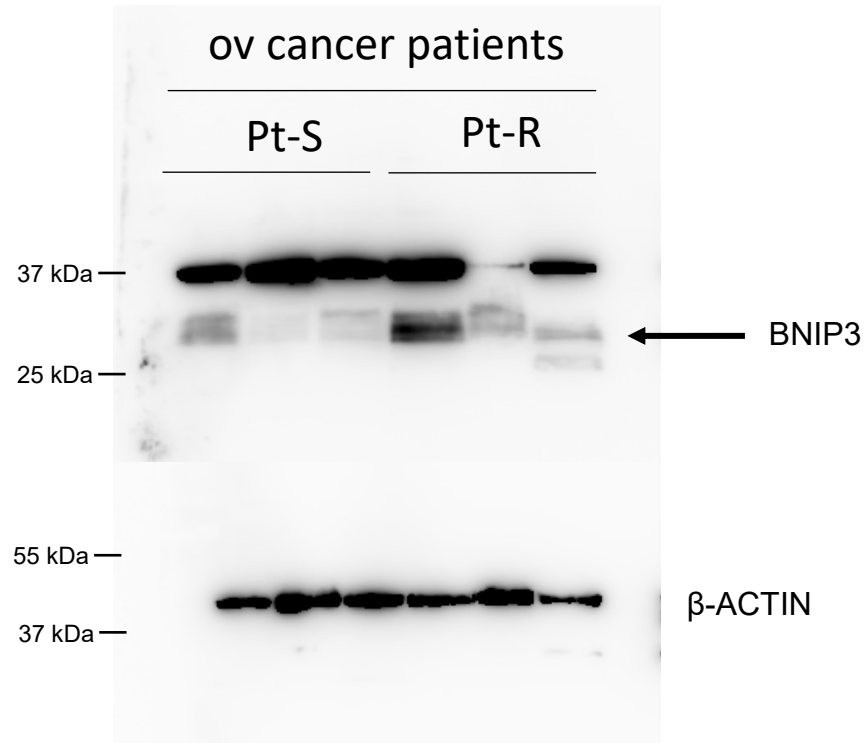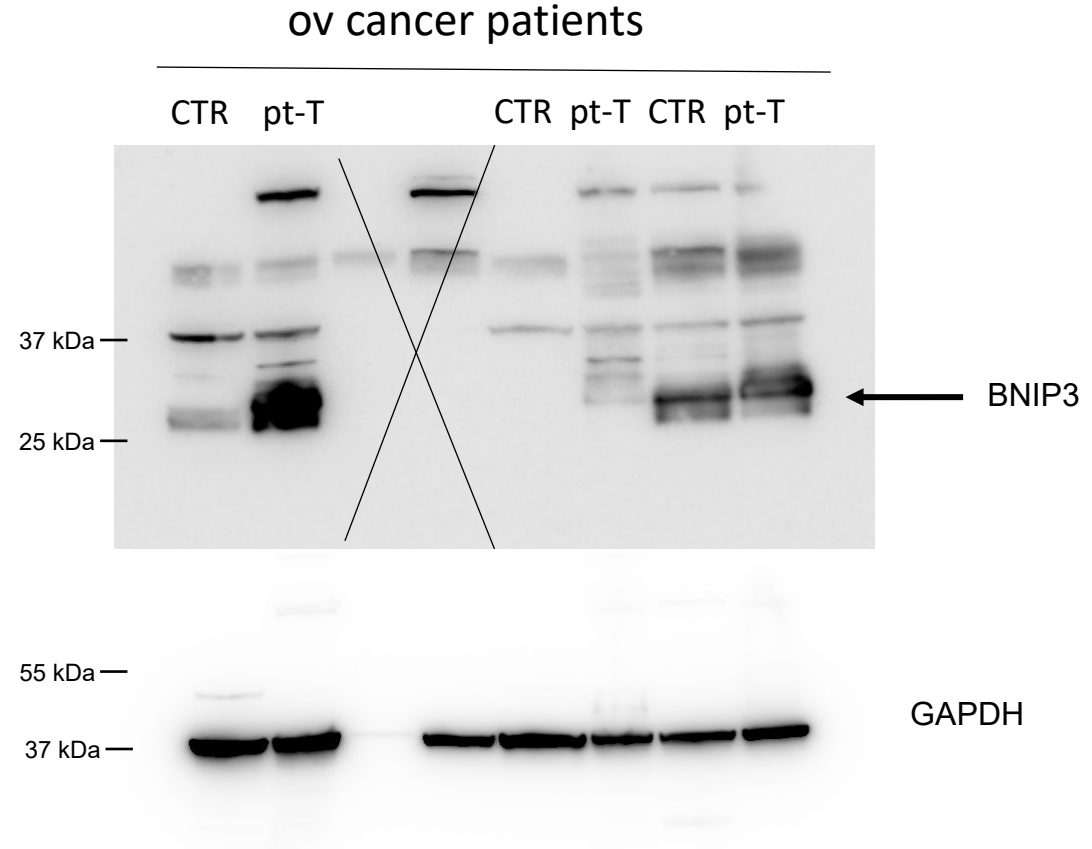

# Original uncropped western blots of Figure 4A

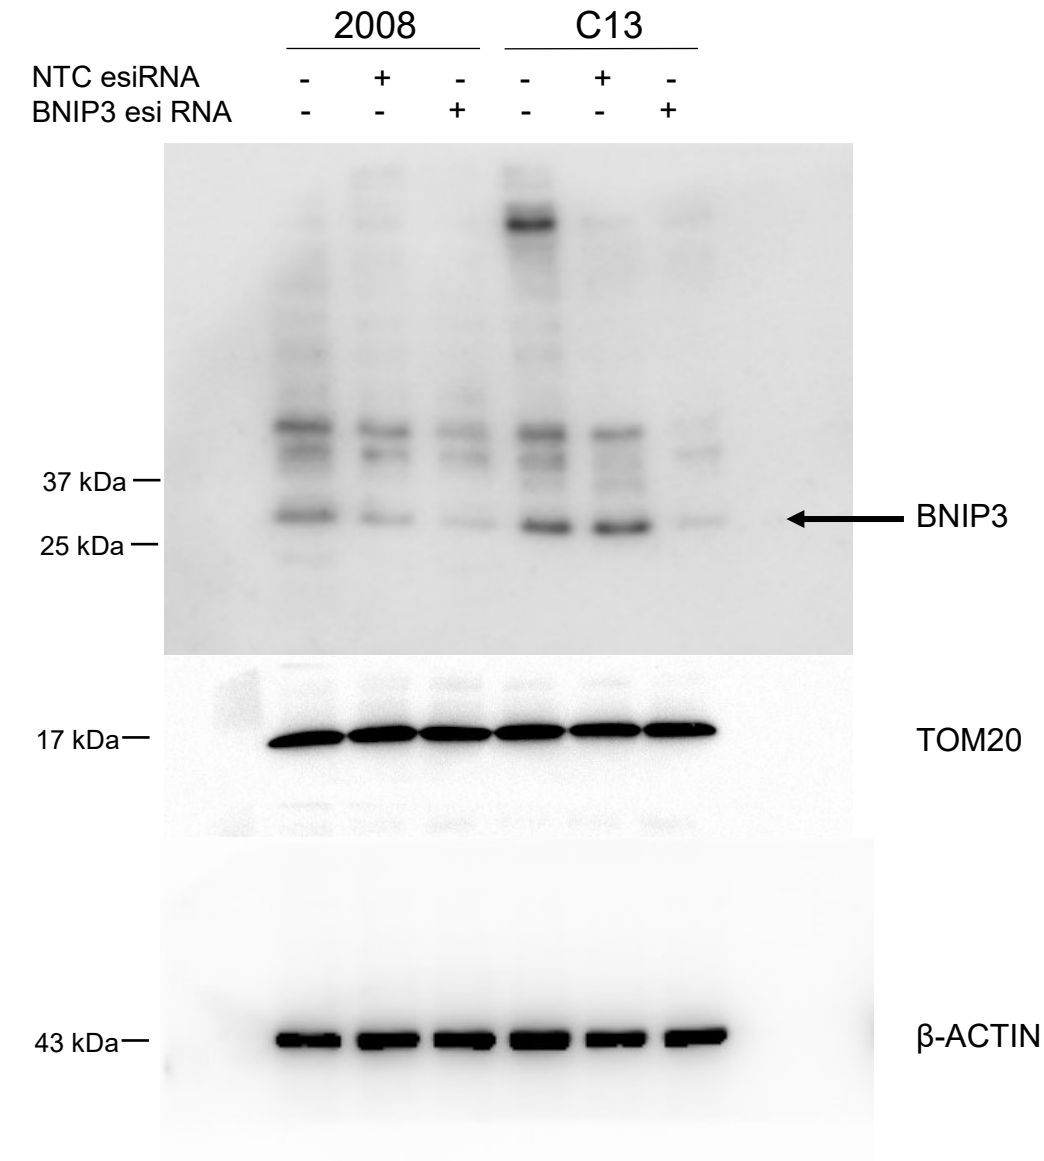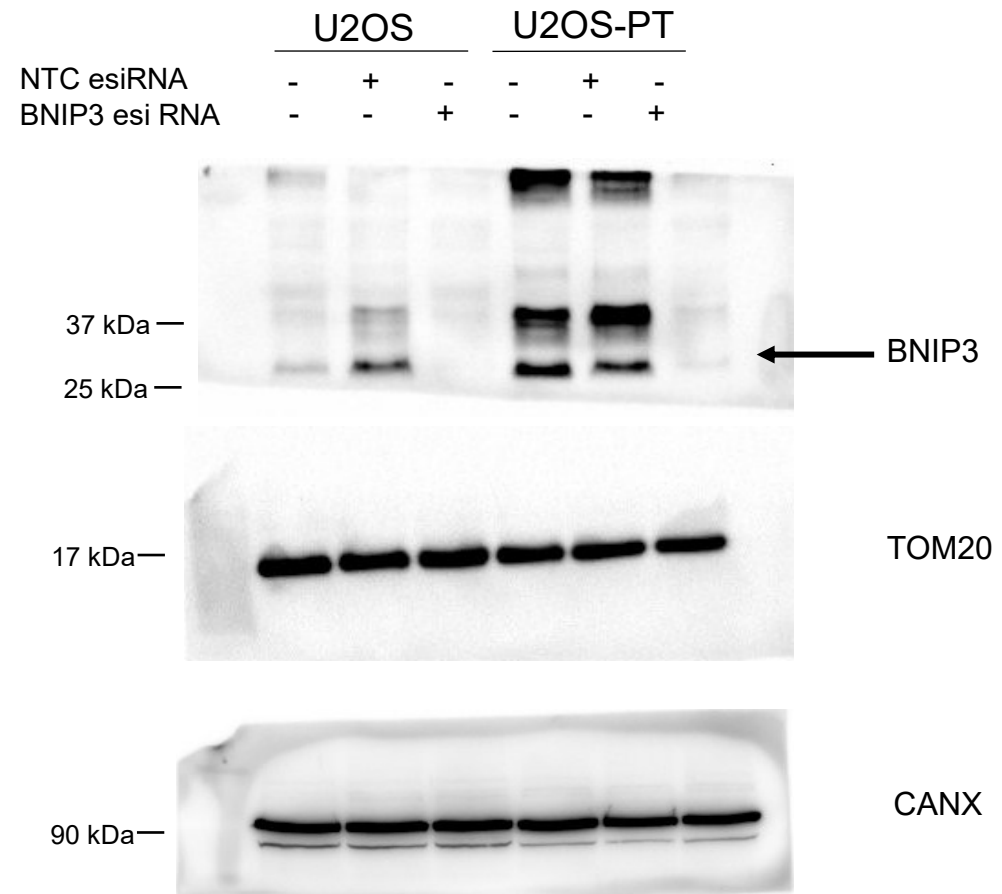

# Original uncropped western blots of Figure 4B

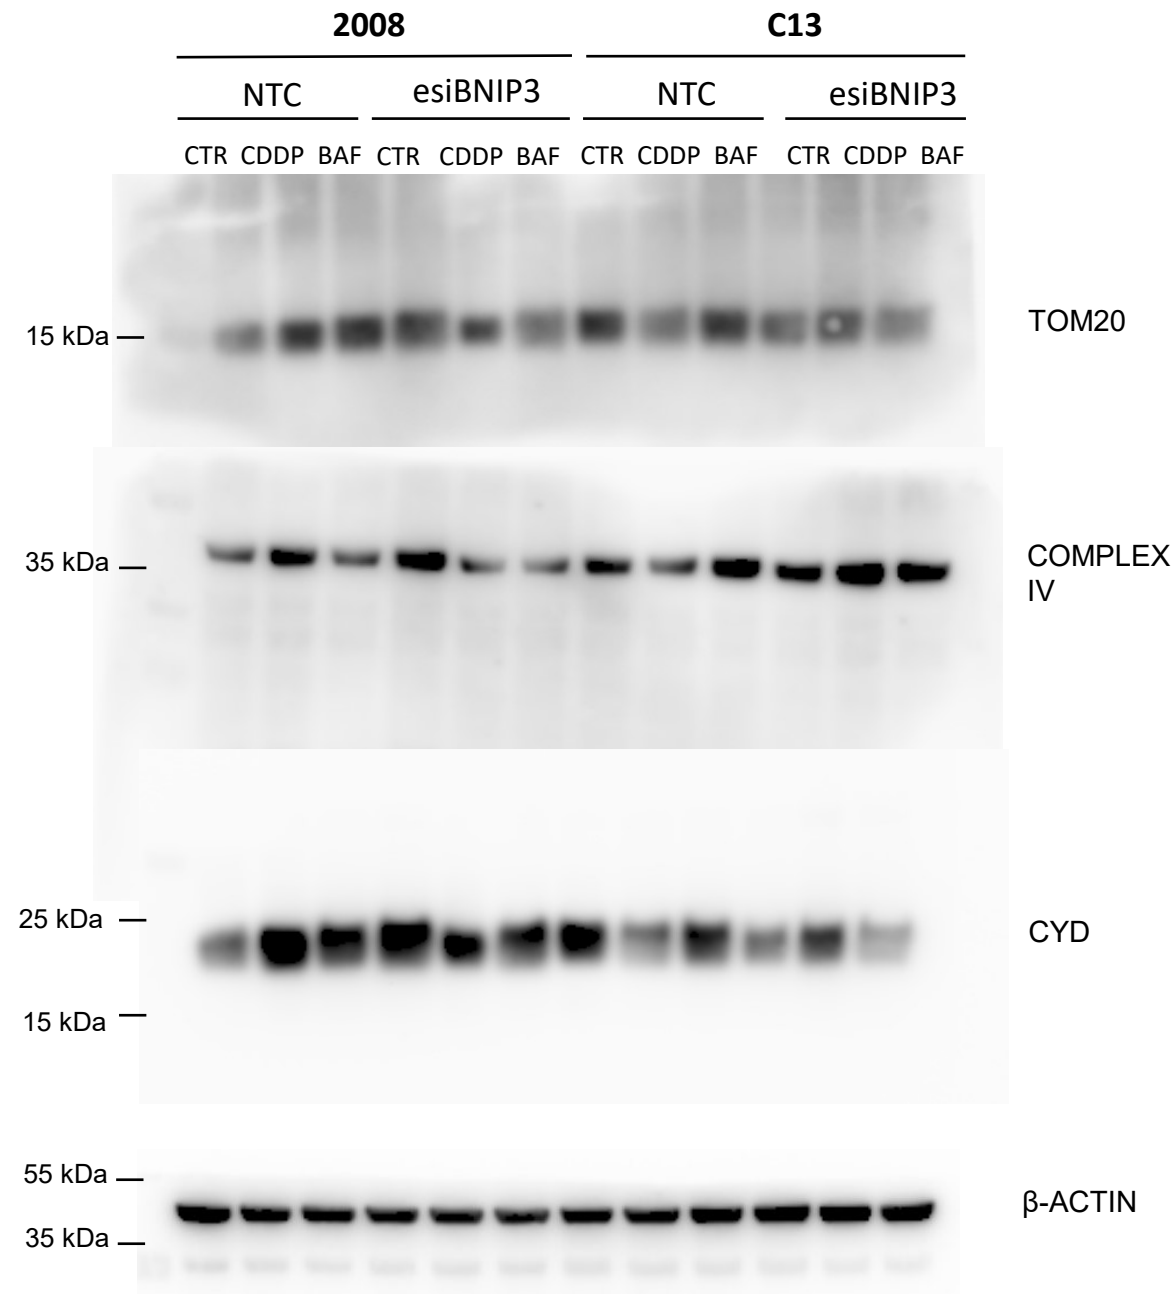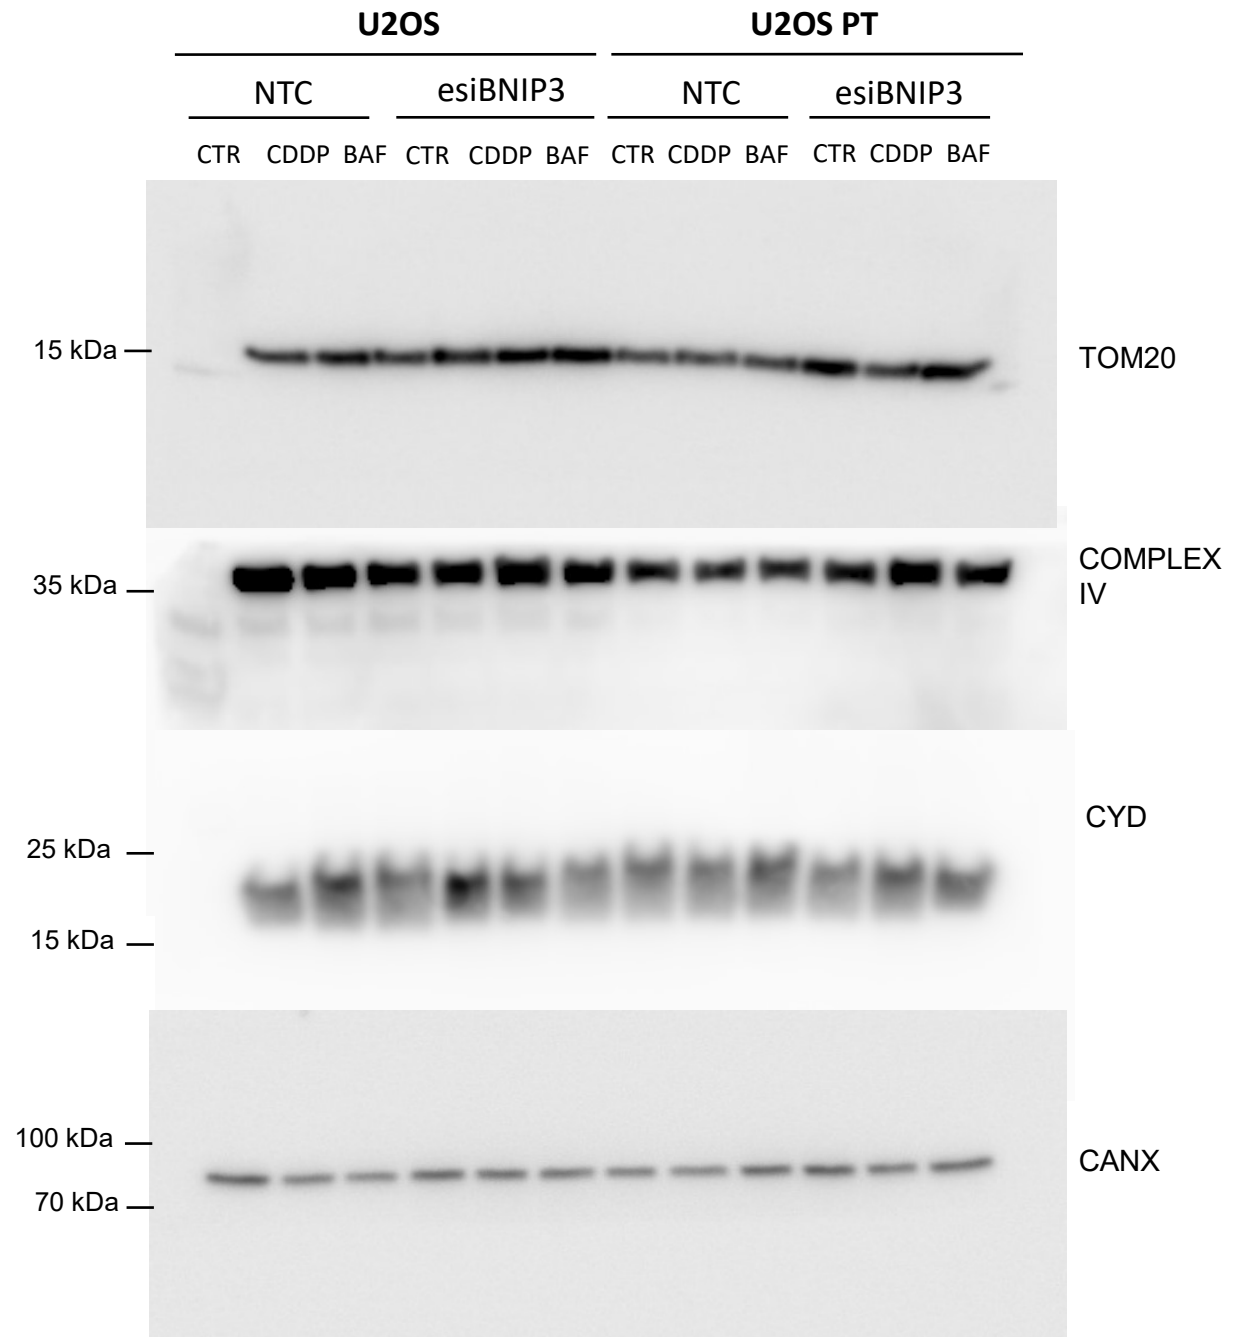

Supplement: 41419_2022_4741_MOESM9_ESM.pdf [file 41419_2022_4741_MOESM9_ESM.pdf]
